# Supplementary material for: Development of novel iron(iii) crosslinked bioinks comprising carboxymethyl cellulose, xanthan gum, and hyaluronic acid for soft tissue engineering applications
Source: Royal Society of Chemistry journal article supplement (doi:10.1039/d4tb00142g), 2024-01-01
Supplement: d4tb00142g1.pdf [file d4tb00142g1.pdf]

**Development of Novel Iron (III) Crosslinked Bioinks Comprising Carboxymethyl Cellulose,  
Xanthan Gum, and Hyaluronic Acid for Soft Tissue Engineering Applications**

Hien-Phuong Le <sup>a</sup>, Kamrul Hassan <sup>a</sup>, Mahnaz Ramezanpour <sup>b,c</sup>, Jonathan A. Campbell <sup>d</sup>, Tran Thanh Tung <sup>a</sup>, Sarah Vreugde <sup>b,c</sup>, Dusan Losic <sup>a,\*</sup>

<sup>a</sup> School of Chemical Engineering, The University of Adelaide, South Australia, 5005, Australia

<sup>b</sup> Department of Surgery-Otolaryngology Head and Neck Surgery, Basil Hetzel Institute for Translational Health Research, Central Adelaide Local Health Network, Woodville South, 5011, Australia

<sup>c</sup> Adelaide Medical School, The University of Adelaide, Adelaide, South Australia, 5005, Australia

<sup>d</sup> Flinders Institute for Nanoscale Science and Technology, College of Science and Engineering, Flinders University, Bedford Park, South Australia, 5041, Australia

\* Corresponding author: Professor Dusan Losic

E-mail address: [dusan.losic@adelaide.edu.au](mailto:dusan.losic@adelaide.edu.au)

## Supplementary Information

### S1. Rheological measurements

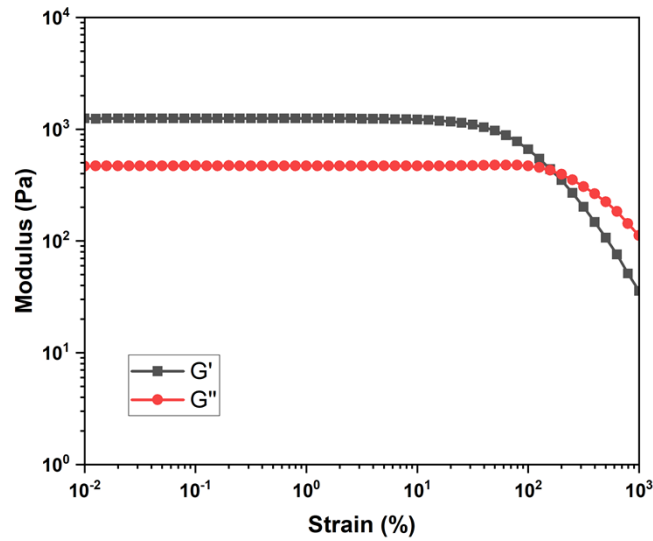

**Figure S1.** Determination of linear viscoelastic region of CMC/XG/HA bioink using oscillatory strain sweep over the range of 0.01% - 1000% strain.

### S2. Quantifications of cell numbers from Live/Dead images

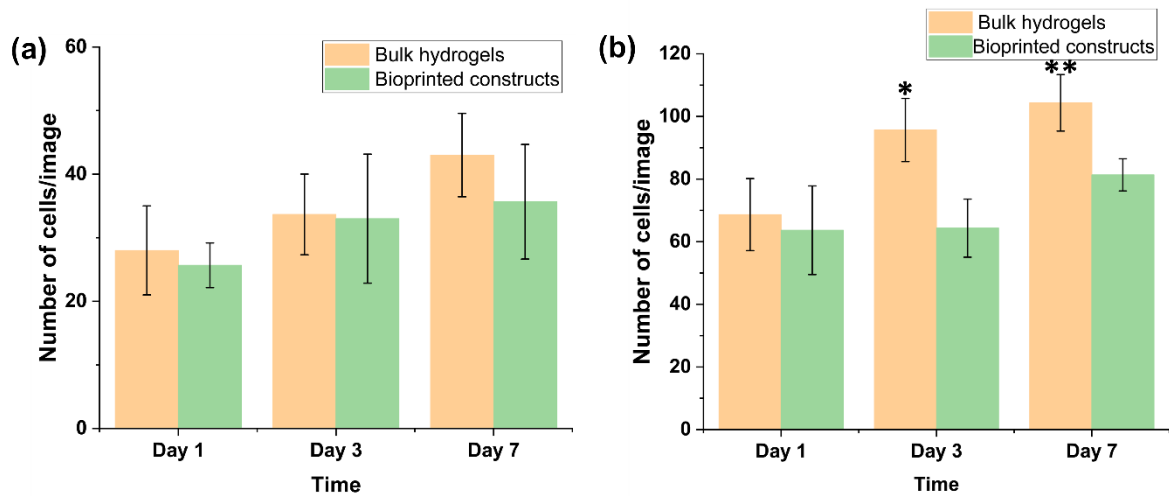

**Figure S2.** Cell proliferation shown as cell numbers counted from Live/Dead images of HaCaT (a) and HFF (b) at different days. The quantitative data was represented as mean  $\pm$  SD (n=3). One-way ANOVA with Holm-Sidak post hoc test, \*  $p < 0.05$  and \*\*  $p < 0.01$  compared to bulk hydrogels at day 1. There was an increasing trend in the numbers of HaCaT in both bulk hydrogels and bioprinted constructs from day 1 to day 7, but the differences were not significant. For HFF, significant cell proliferation from day 1 to day 3 was observed in bulk hydrogels, but the difference between 3 and 7 d was not significant.
